# Supplementary material
Source: Springer Nature journal article supplement (https://www.springermedizin.de/resource/supplementary/12884_2013_834_MOESM1_ESM.pdf/9458304)

|                |   |   |     |   |
|----------------|---|---|-----|---|
| Swedish NICU A | x | x | x   |   |
| Swedish NICU B |   | x | x   |   |
| English NICU C |   | x | x   |   |
| English NICU D |   |   | (x) | x |

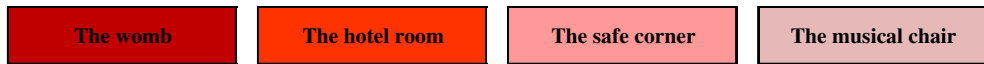

|                              |     |                  |              |    |
|------------------------------|-----|------------------|--------------|----|
| <b>Ownership</b>             | Yes | Yes/Intermittent | Intermittent | No |
| <b>At-homeness</b>           | Yes | Varying          | Varying      | No |
| <b>Door/shield</b>           |     |                  |              |    |
| against 'others' entering    | Yes | Yes              | No           | No |
| privacy                      | Yes | Yes              | Intermittent | No |
| focus within                 | Yes | Yes/Intermittent | Intermittent | No |
| regulating socialising       | Yes | Yes/Intermittent | No           | No |
| <b>Window of opportunity</b> | Yes | Yes              | Intermittent | No |

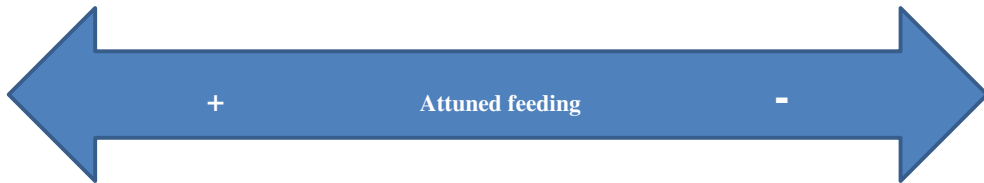

Supplement: MOESM1 [file 9458304]
